# Supplementary material for: The structural evolution of poly(ethylene terephthalate) oligomers produced via glycolysis depolymerization
Source: Royal Society of Chemistry journal article supplement (doi:10.1039/d2ta07467b), 2023-01-01
Supplement: d2ta07467b1.pdf [file d2ta07467b1.pdf]

Supporting Information

The Structural Evolution of Poly(ethylene terephthalate) Oligomers Produced via Glycolysis  
Depolymerization

Joshua Moncada<sup>1</sup>, Mark D. Dadmun<sup>1,2,\*</sup>

<sup>1</sup>Department of Chemistry, University of Tennessee, Knoxville, Tennessee 37996

<sup>2</sup>Chemical Sciences Division, Oak Ridge National Laboratory, Oak Ridge, Tennessee 37830

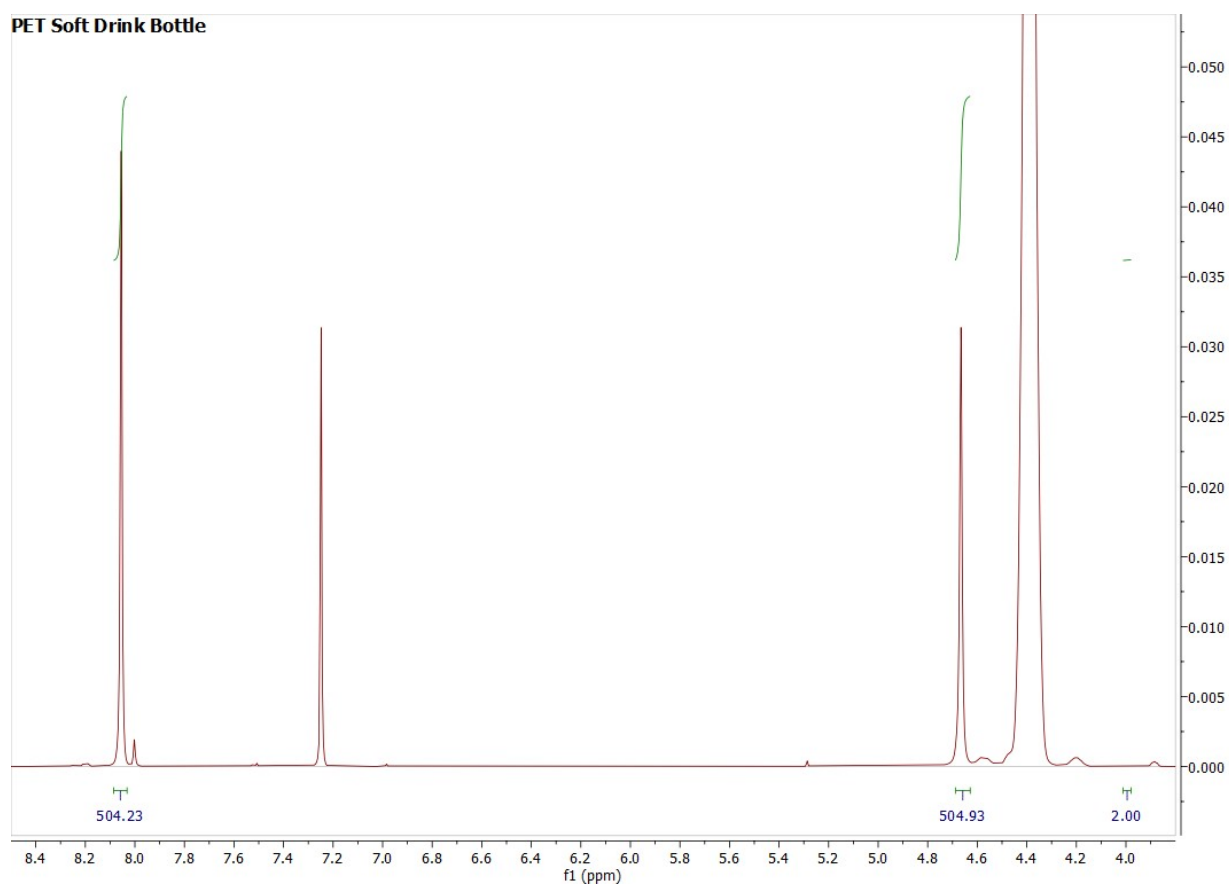

Figure S1- NMR spectra for the starting PET material.

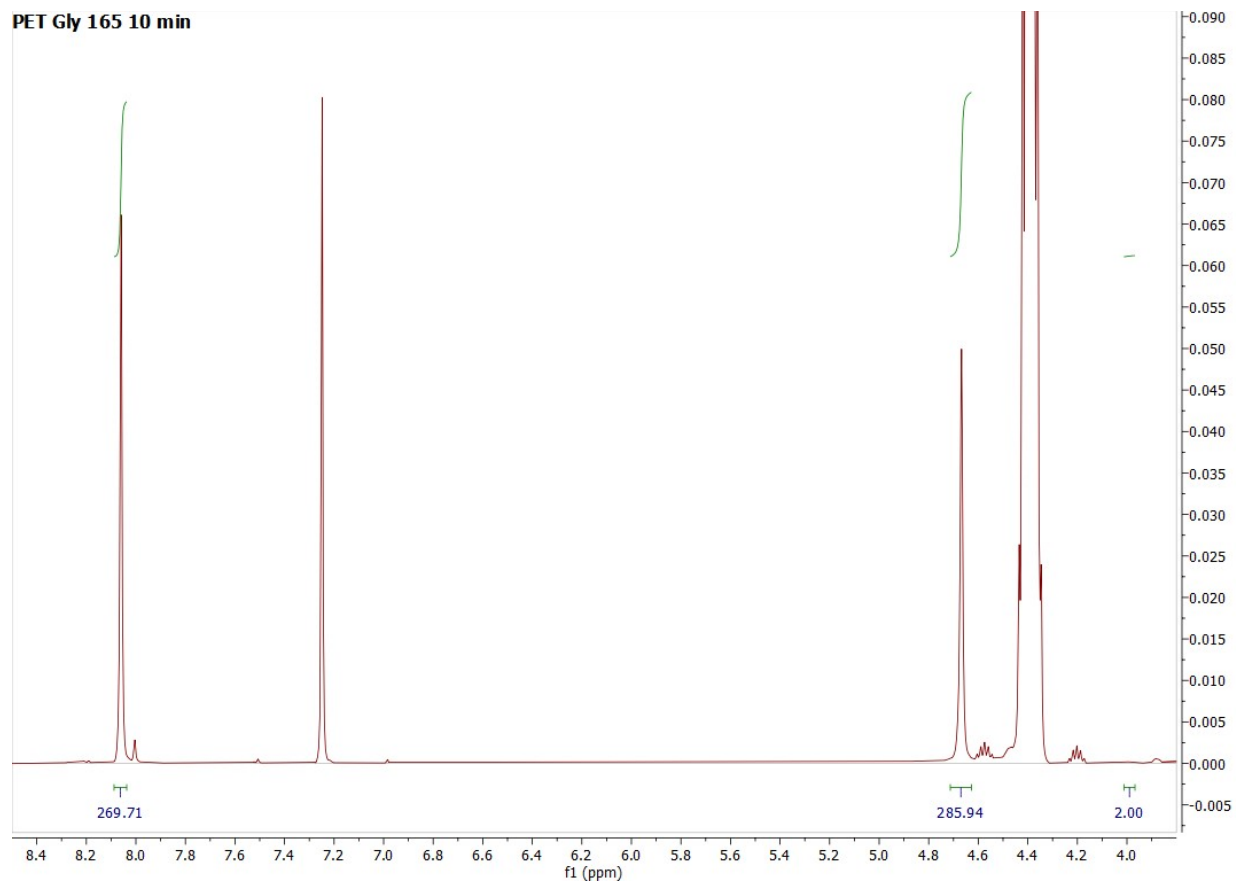

Figure S2-NMR spectra for the depolymerized PET from a 10-minute glycolysis reaction run at 165 °C, PET:Zn(Ac)<sub>2</sub> mole ratio of 100:1.

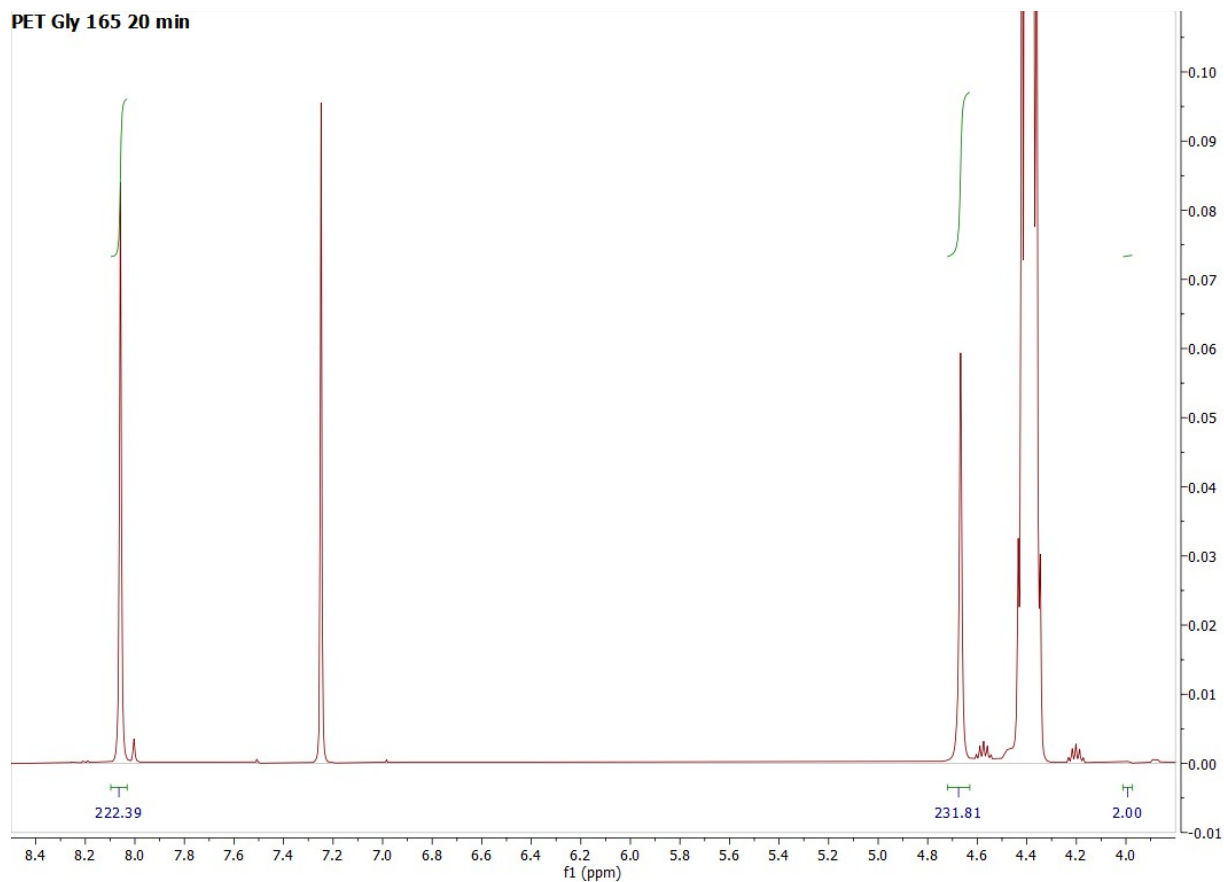

Figure S3- NMR spectra for the depolymerized PET from a 20-minute glycolysis reaction run at 165 °C, PET:Zn(Ac)<sub>2</sub> mole ratio of 100:1.

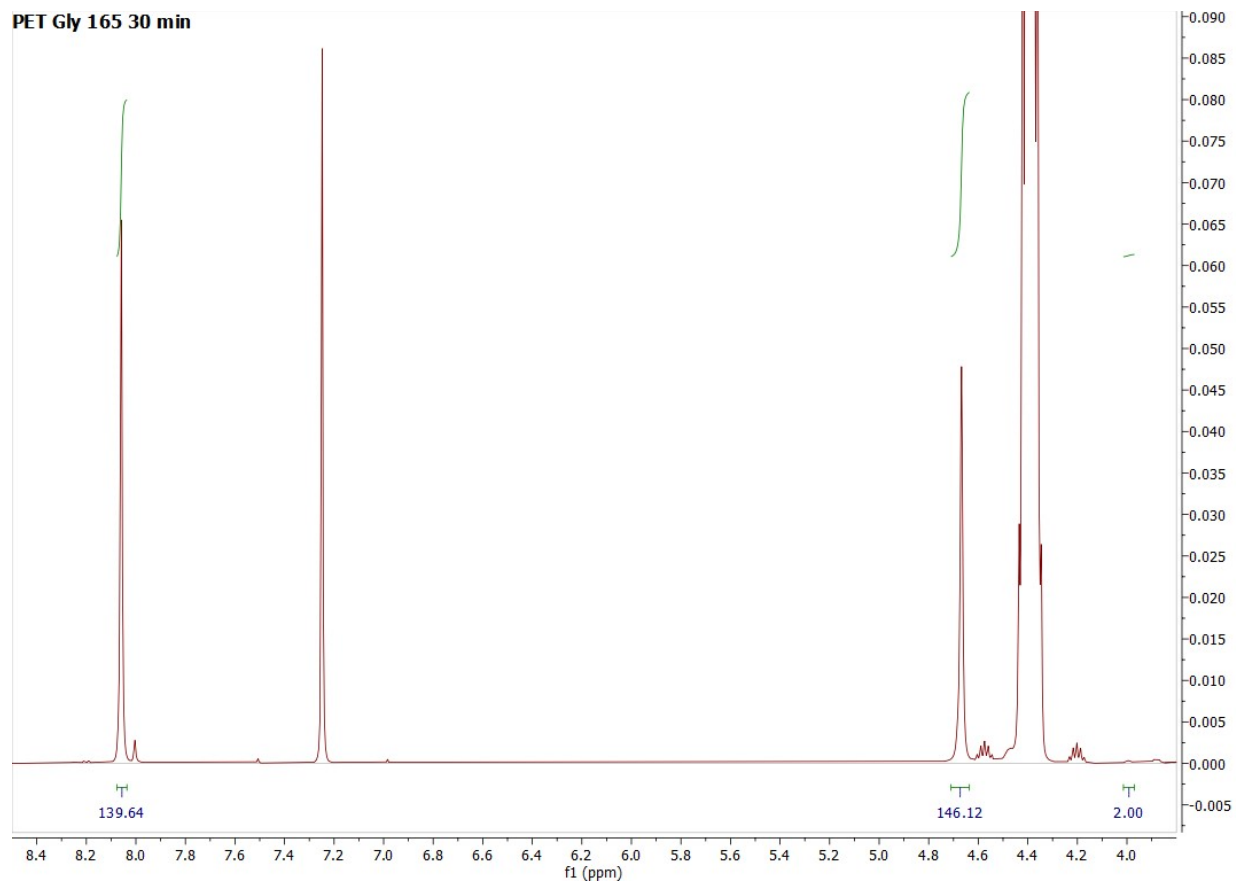

Figure S4-NMR spectra for the depolymerized PET from a 30-minute glycolysis reaction run at 165 °C, PET:Zn(Ac)<sub>2</sub> mole ratio of 100:1.

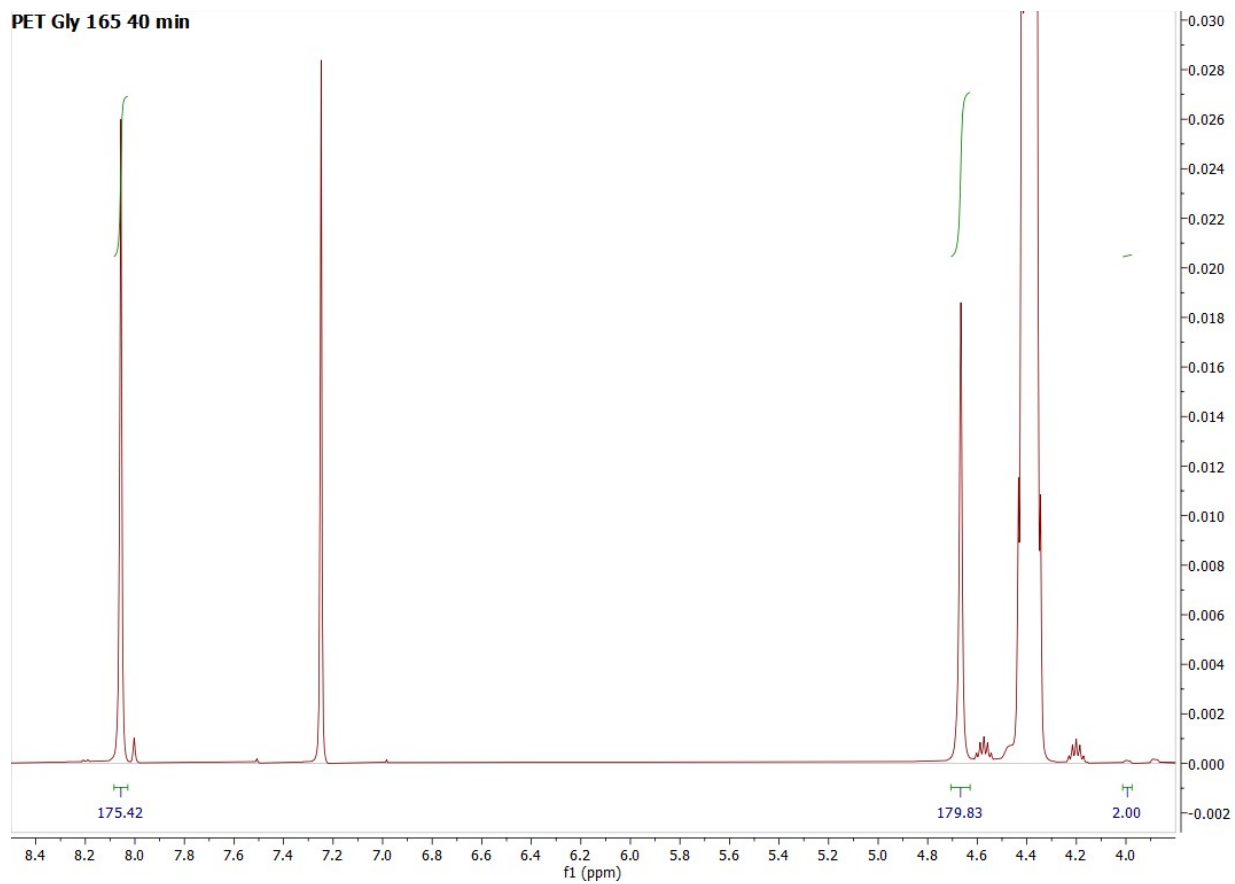

Figure S5-NMR spectra for the depolymerized PET from a 40-minute glycolysis reaction run at 165 °C, PET:Zn(Ac)<sub>2</sub> mole ratio of 100:1.

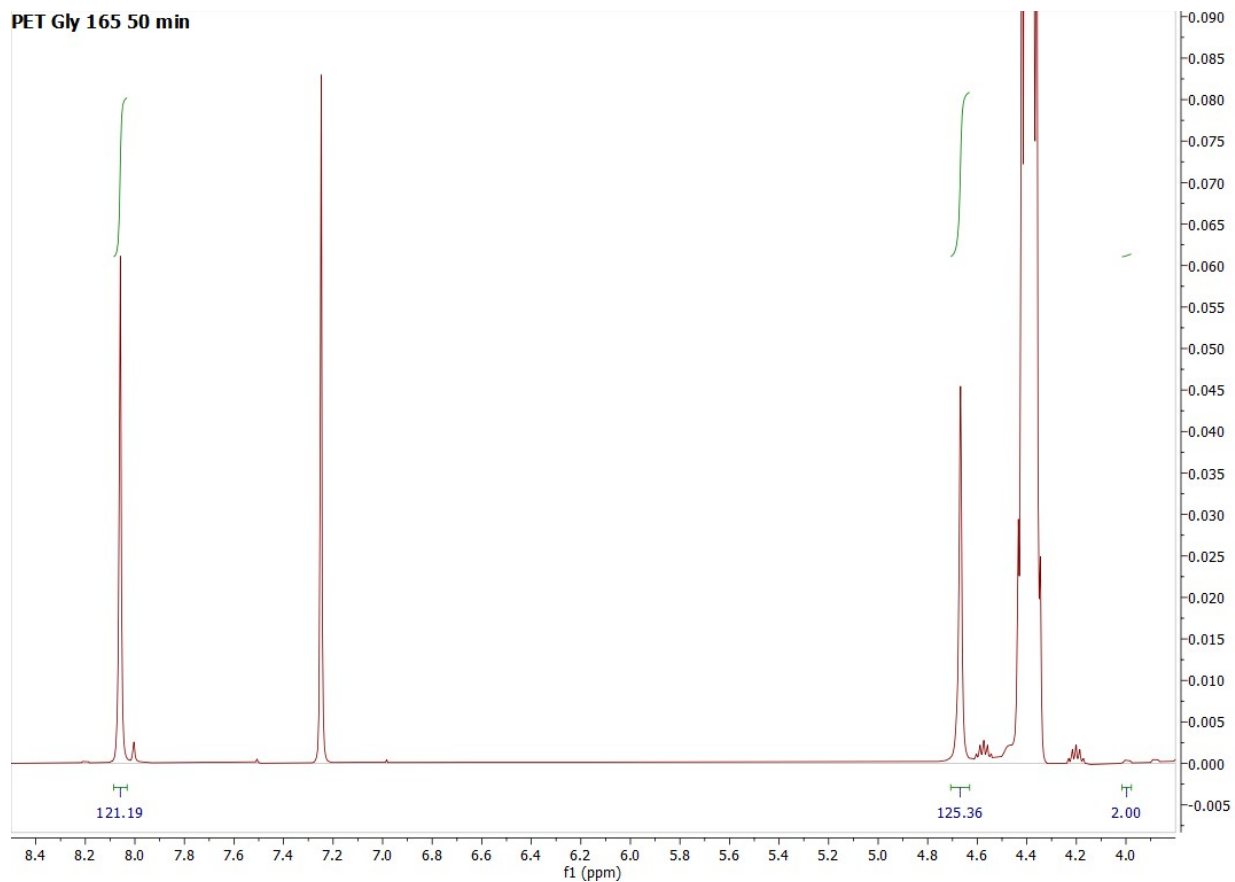

Figure S6-NMR spectra for the depolymerized PET from a 50-minute glycolysis reaction run at 165 °C, PET:Zn(Ac)<sub>2</sub> mole ratio of 100:1.

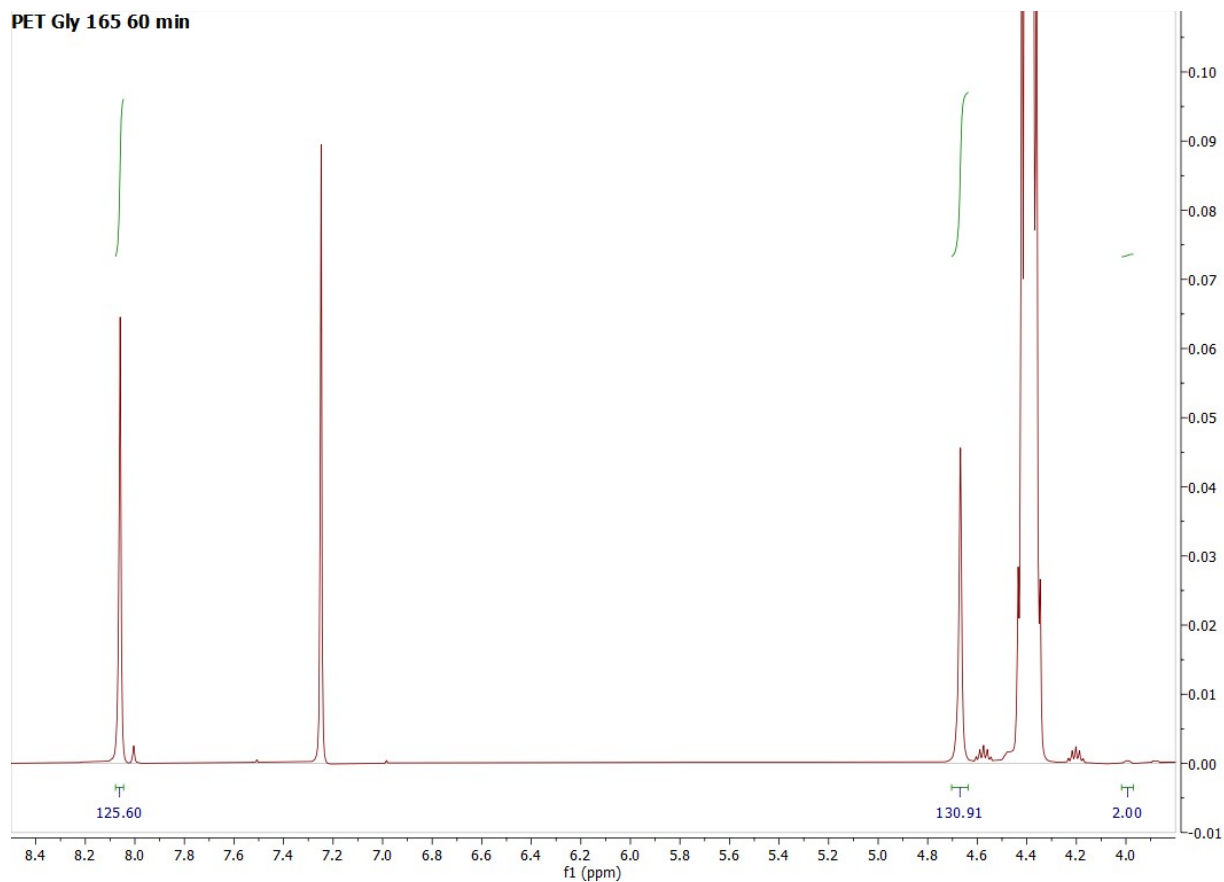

Figure S7-NMR spectra for the depolymerized PET from a 60-minute glycolysis reaction run at 165 °C, PET:Zn(Ac)<sub>2</sub> mole ratio of 100:1.

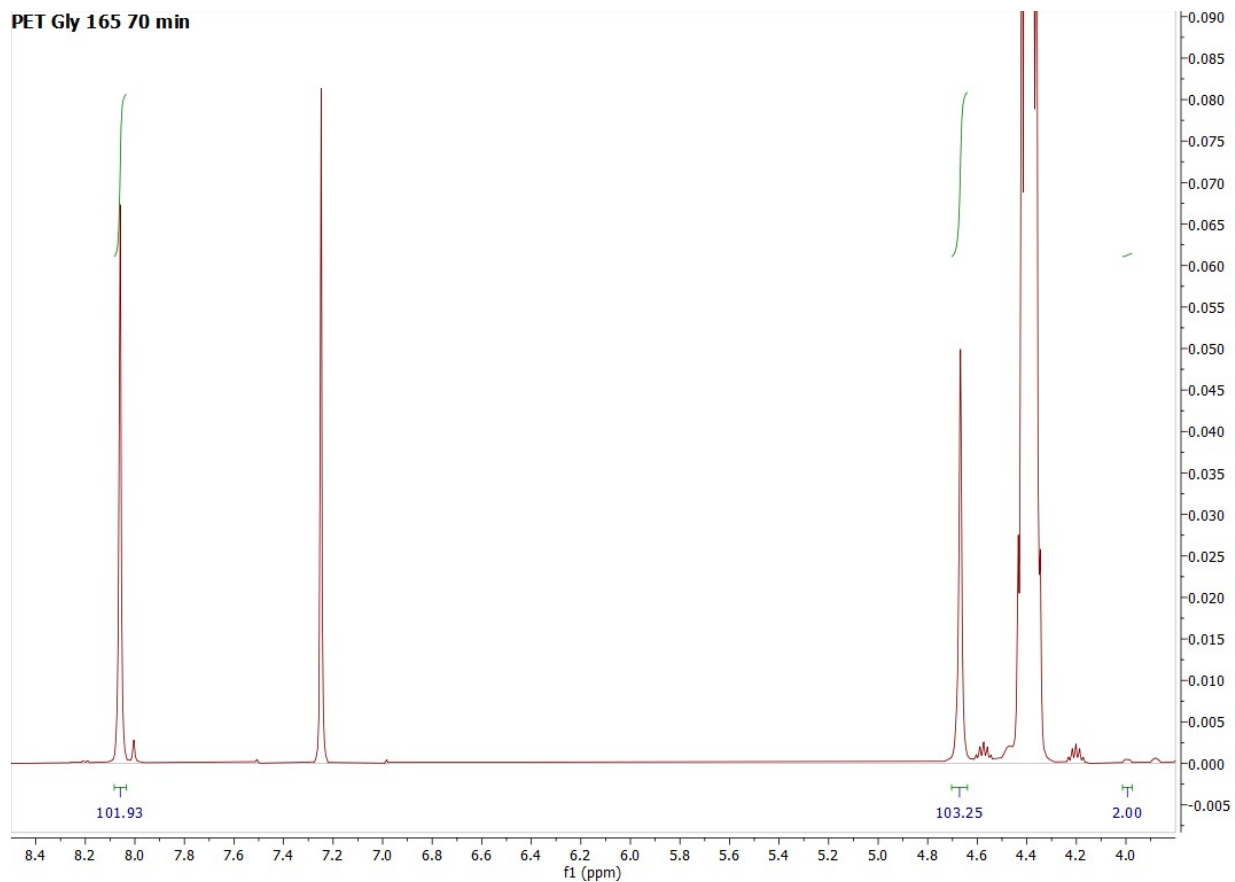

Figure S8-NMR spectra for the depolymerized PET from a 70-minute glycolysis reaction run at 165 °C, PET:Zn(Ac)<sub>2</sub> mole ratio of 100:1.



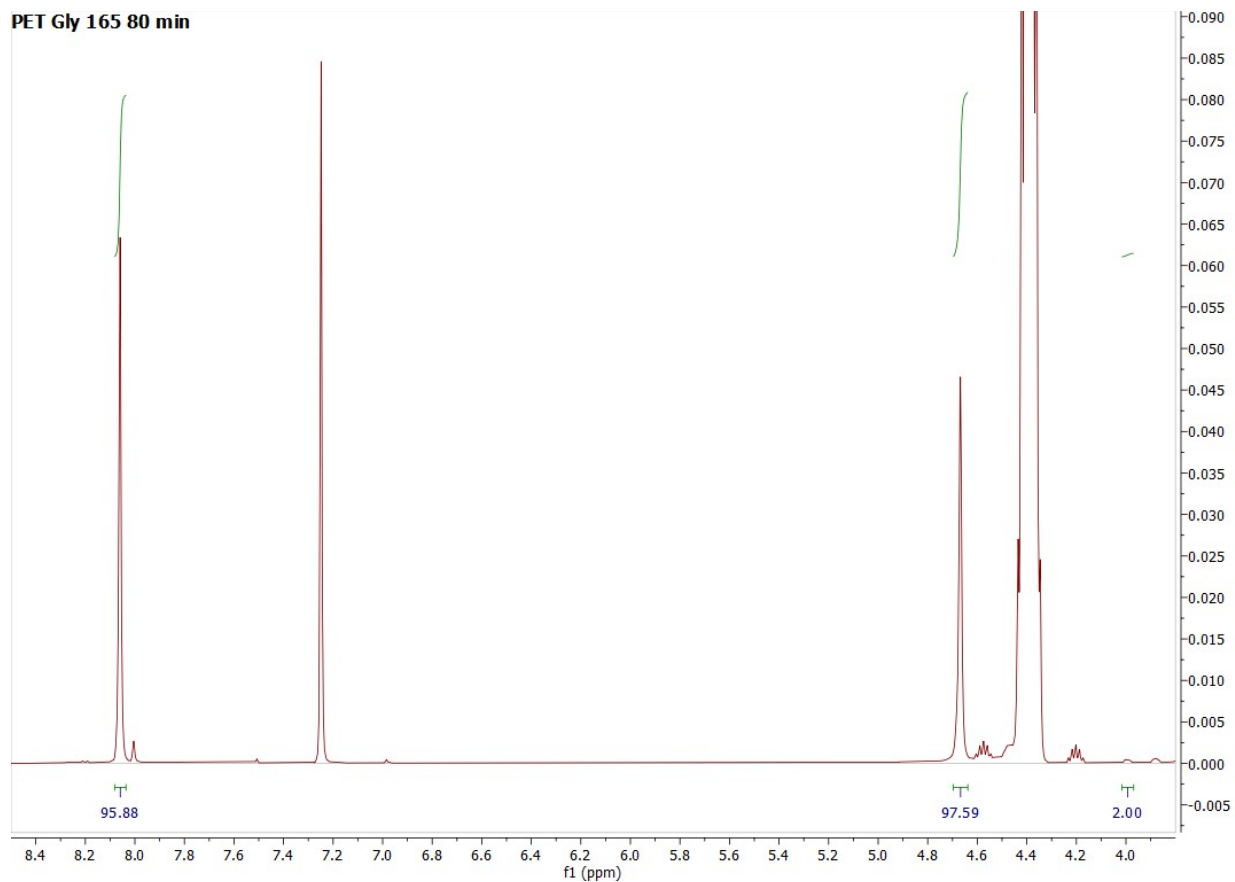

Figure S9-NMR spectra for the depolymerized PET from an 80-minute glycolysis reaction run at 165 °C, PET:Zn(Ac)<sub>2</sub> mole ratio of 100:1.

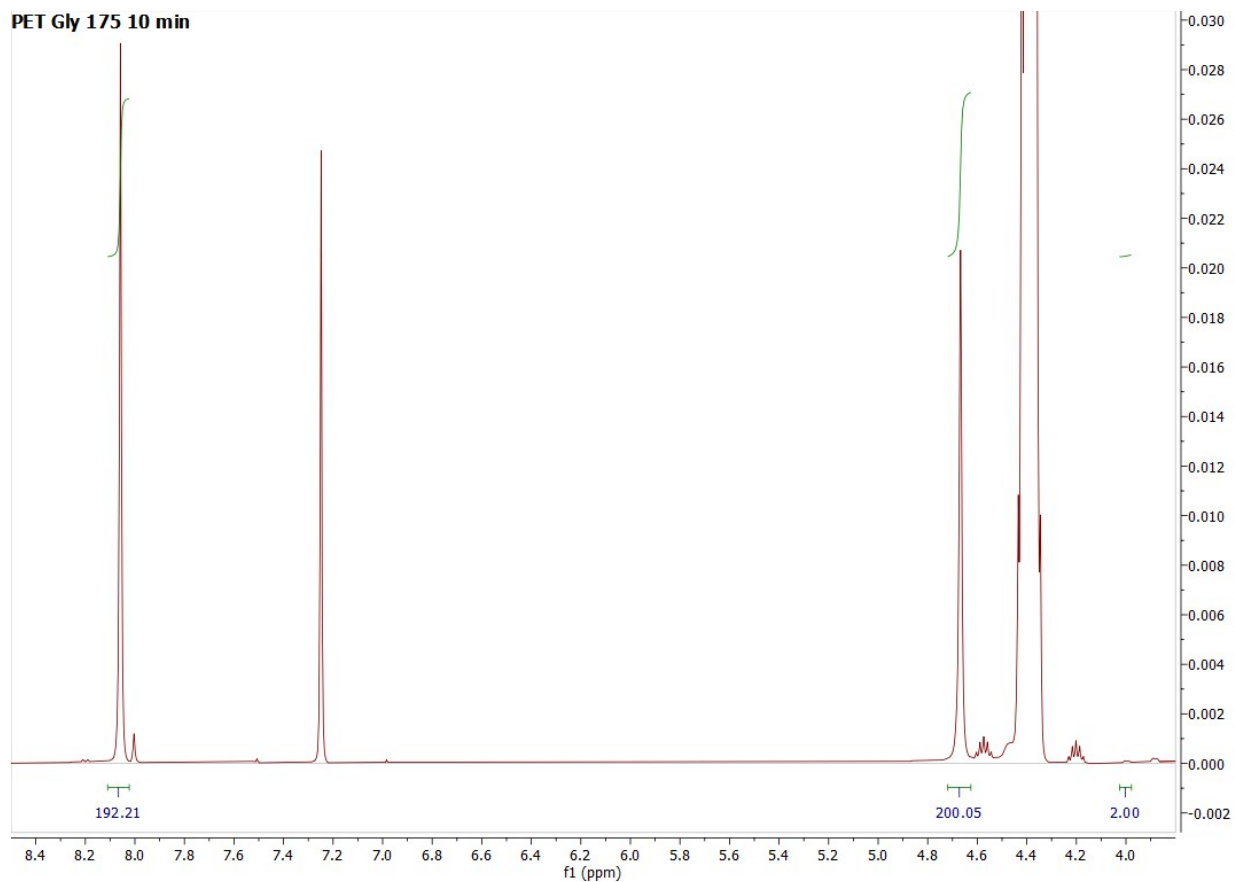

Figure S10-NMR spectra for the depolymerized PET from a 10-minute glycolysis reaction run at 175 °C, PET:Zn(Ac)<sub>2</sub> mole ratio of 100:1.

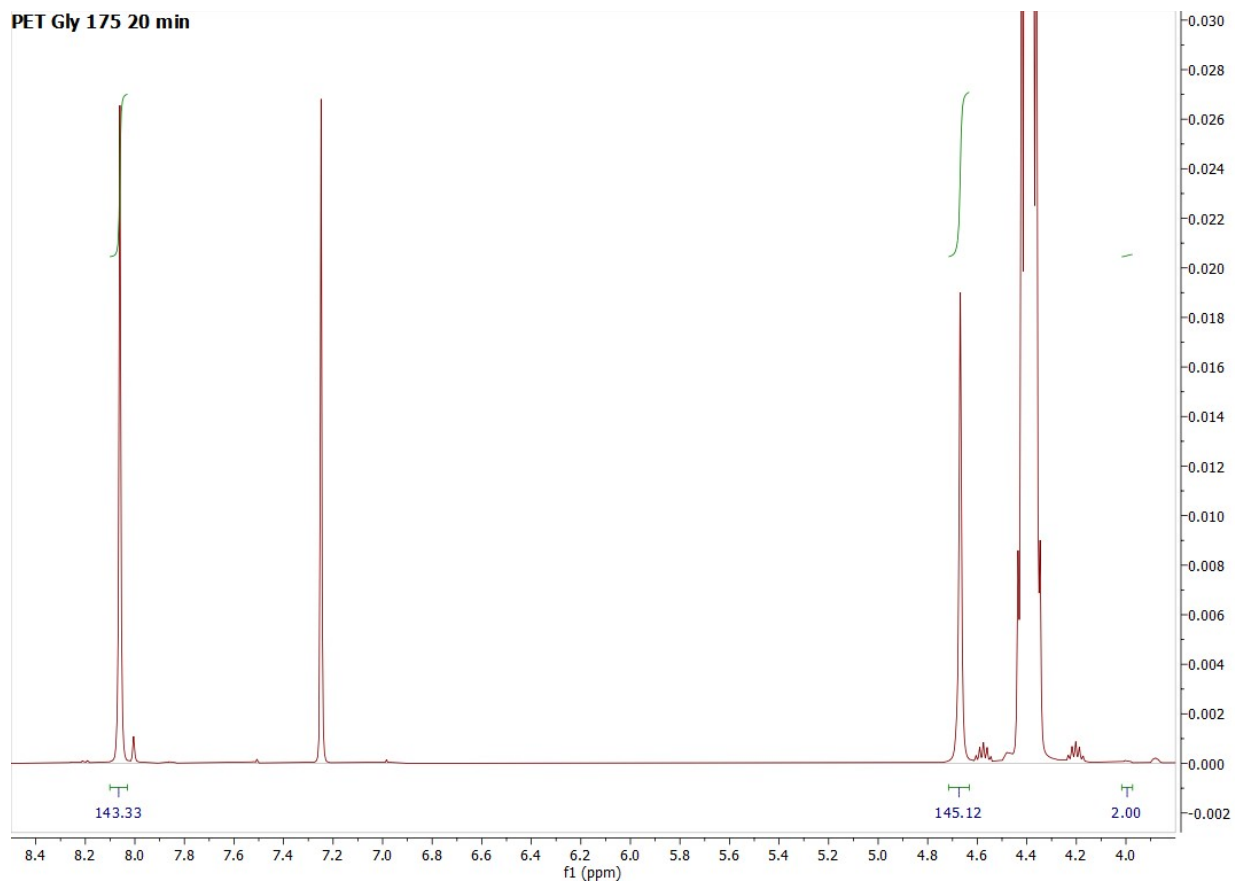

Figure S11-NMR spectra for the depolymerized PET from a 20-minute glycolysis reaction run at 175 °C, PET:Zn(Ac)<sub>2</sub> mole ratio of 100:1.

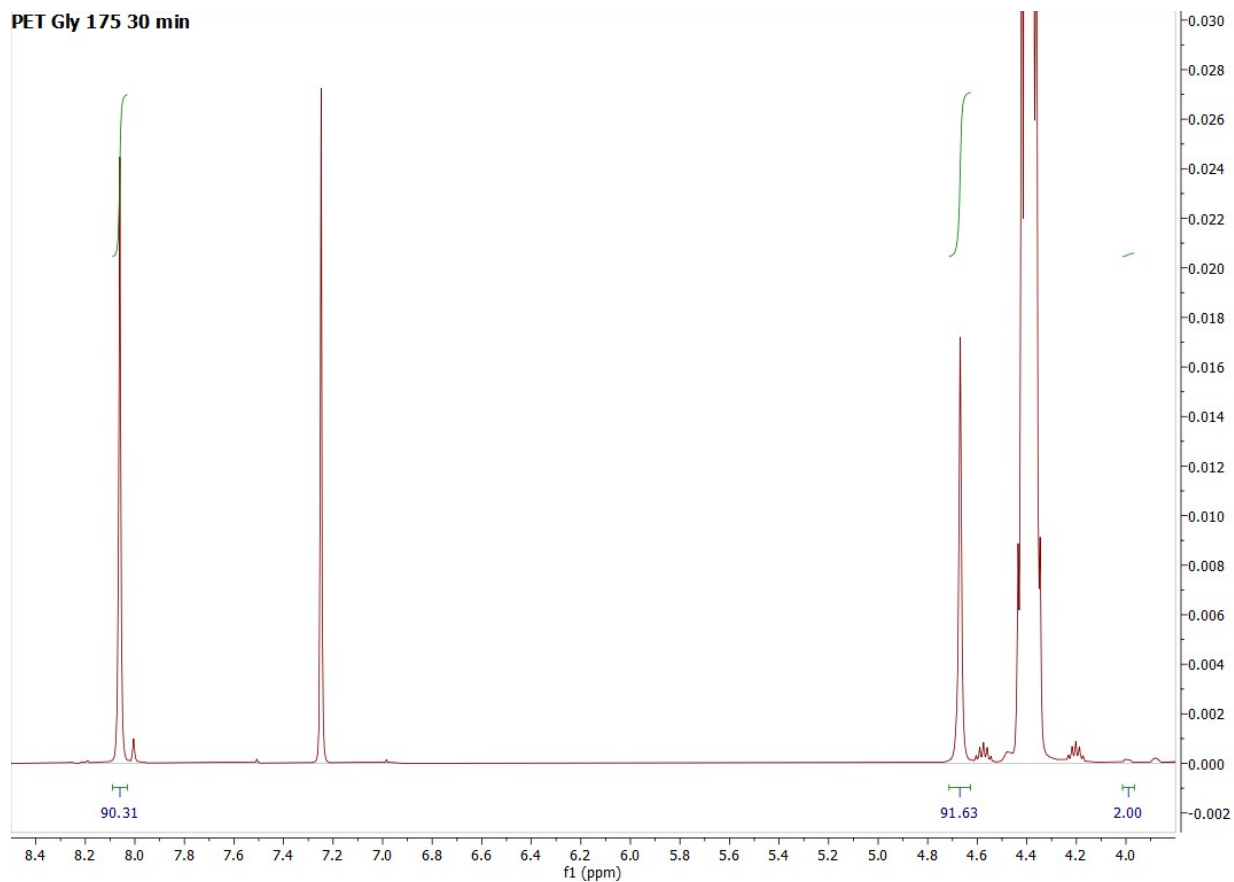

Figure S12-NMR spectra for the depolymerized PET from a 30-minute glycolysis reaction run at 175 °C, PET:Zn(Ac)<sub>2</sub> mole ratio of 100:1.

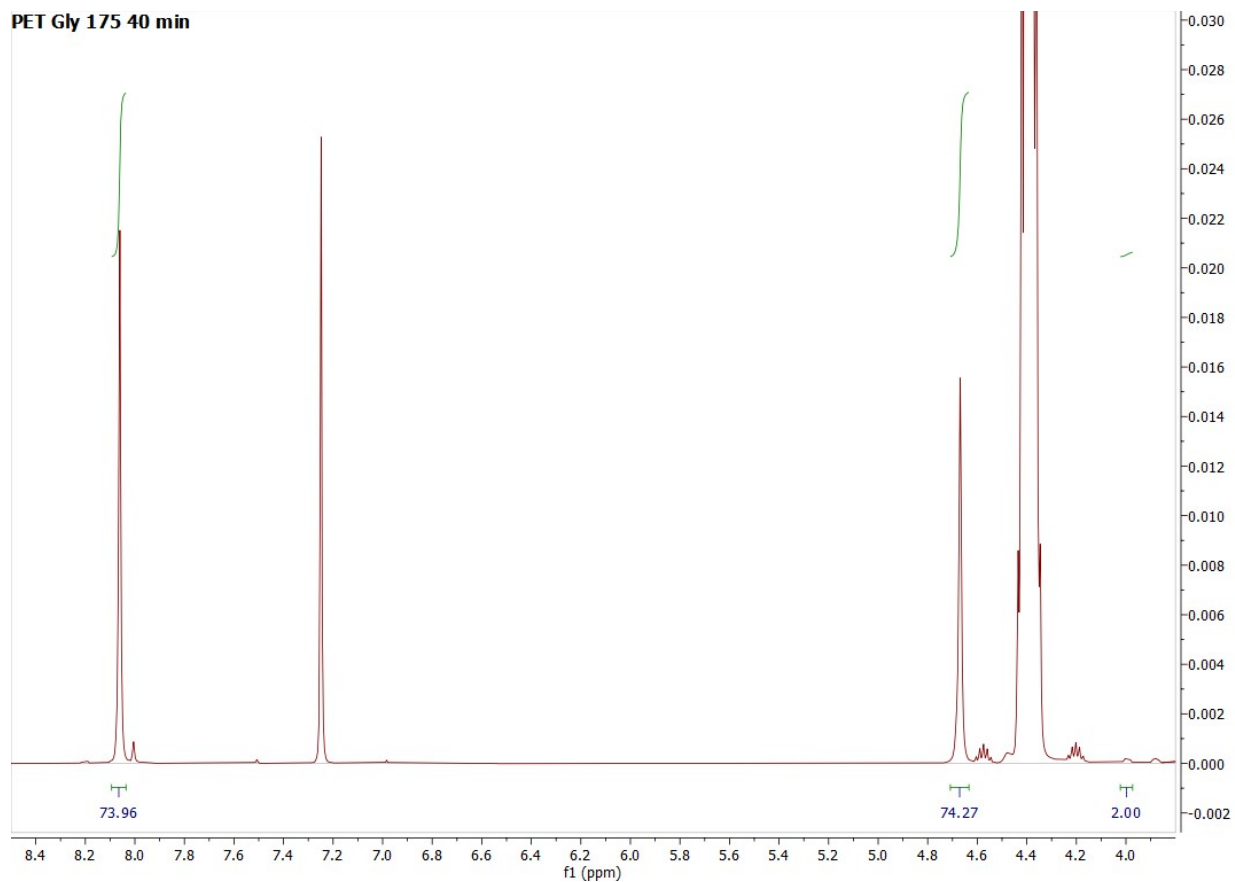

Figure S13-NMR spectra for the depolymerized PET from a 40-minute glycolysis reaction run at 175 °C, PET:Zn(Ac)<sub>2</sub> mole ratio of 100:1.

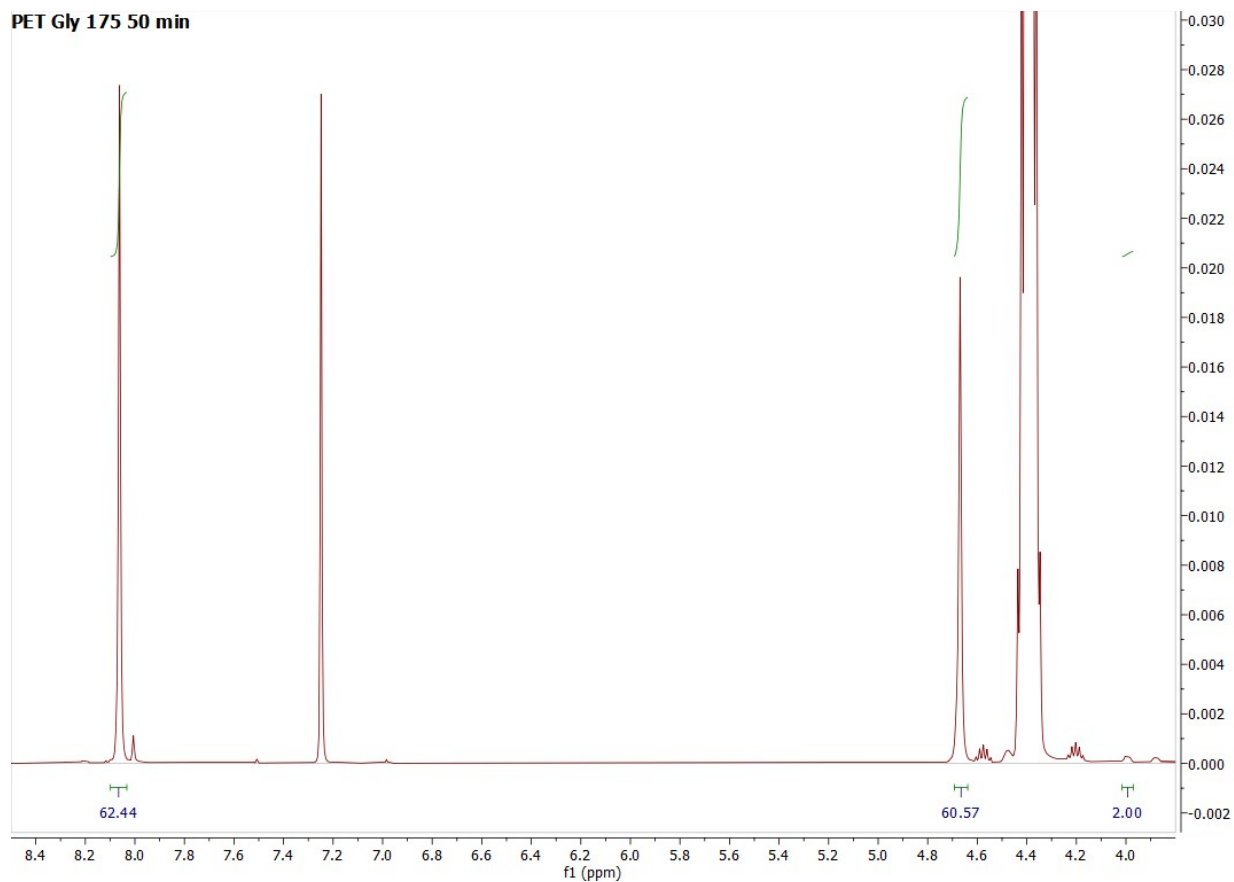

Figure S14-NMR spectra for the depolymerized PET from a 50-minute glycolysis reaction run at 175 °C, PET:Zn(Ac)<sub>2</sub> mole ratio of 100:1.

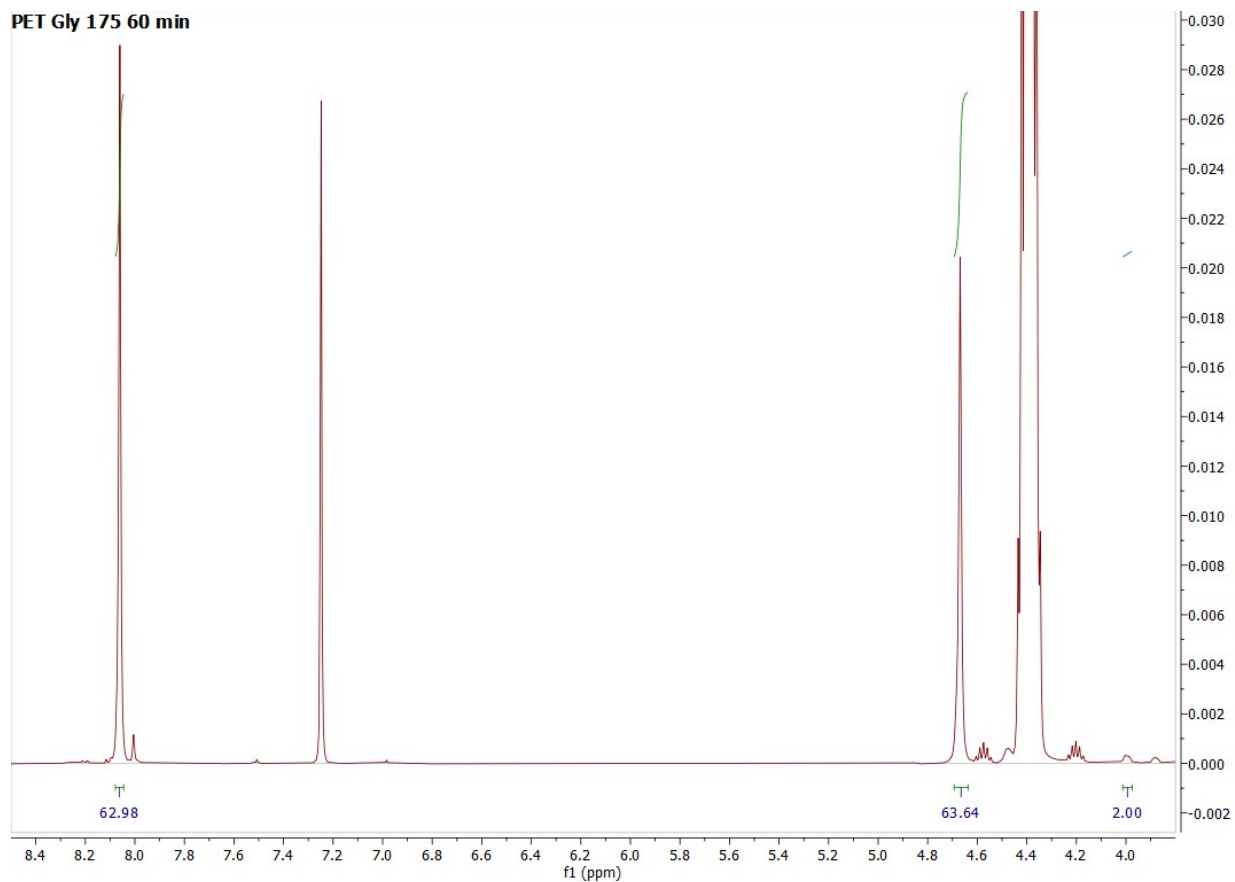

Figure S15-NMR spectra for the depolymerized PET from a 60-minute glycolysis reaction run at 175 °C, PET:Zn(Ac)<sub>2</sub> mole ratio of 100:1.

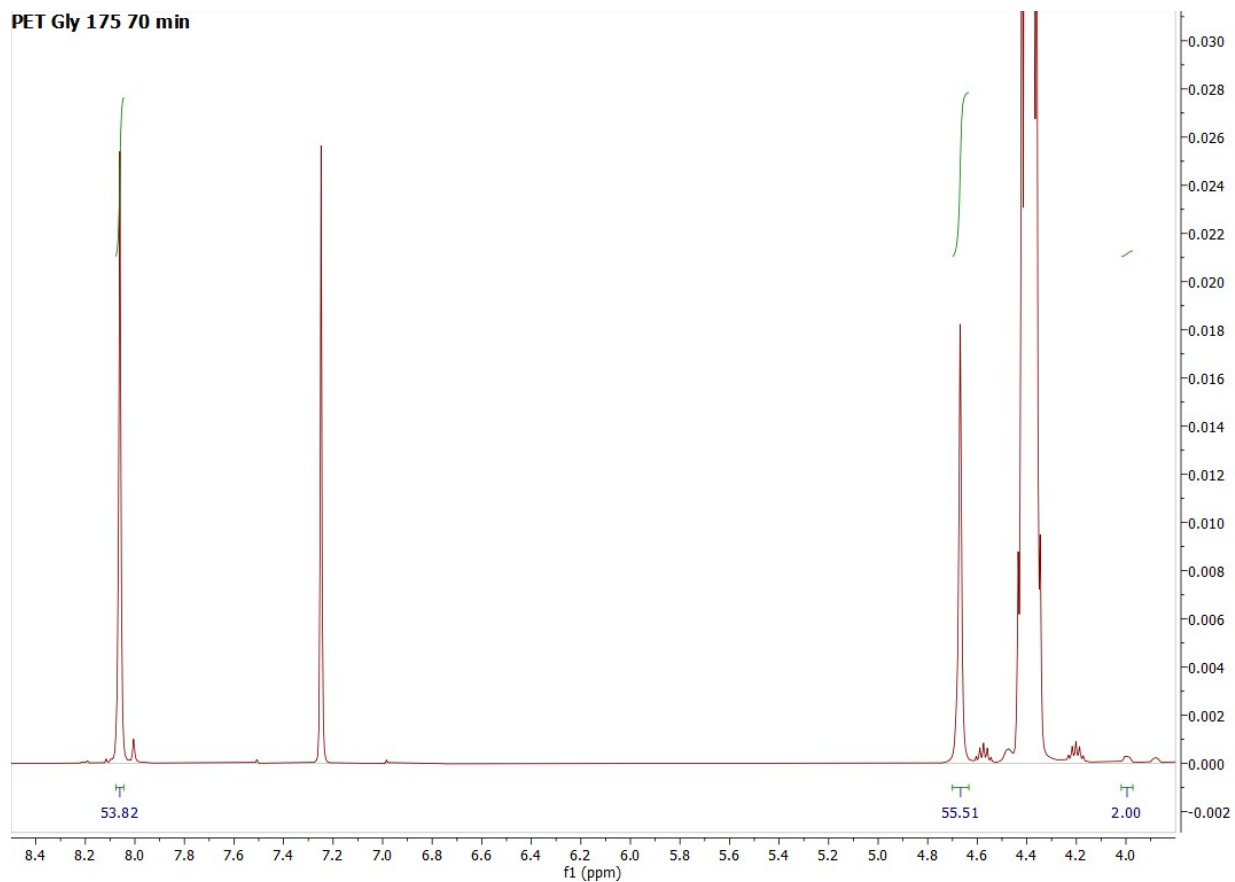

Figure S16-NMR spectra for the depolymerized PET from a 70-minute glycolysis reaction run at 175 °C, PET:Zn(Ac)<sub>2</sub> mole ratio of 100:1.



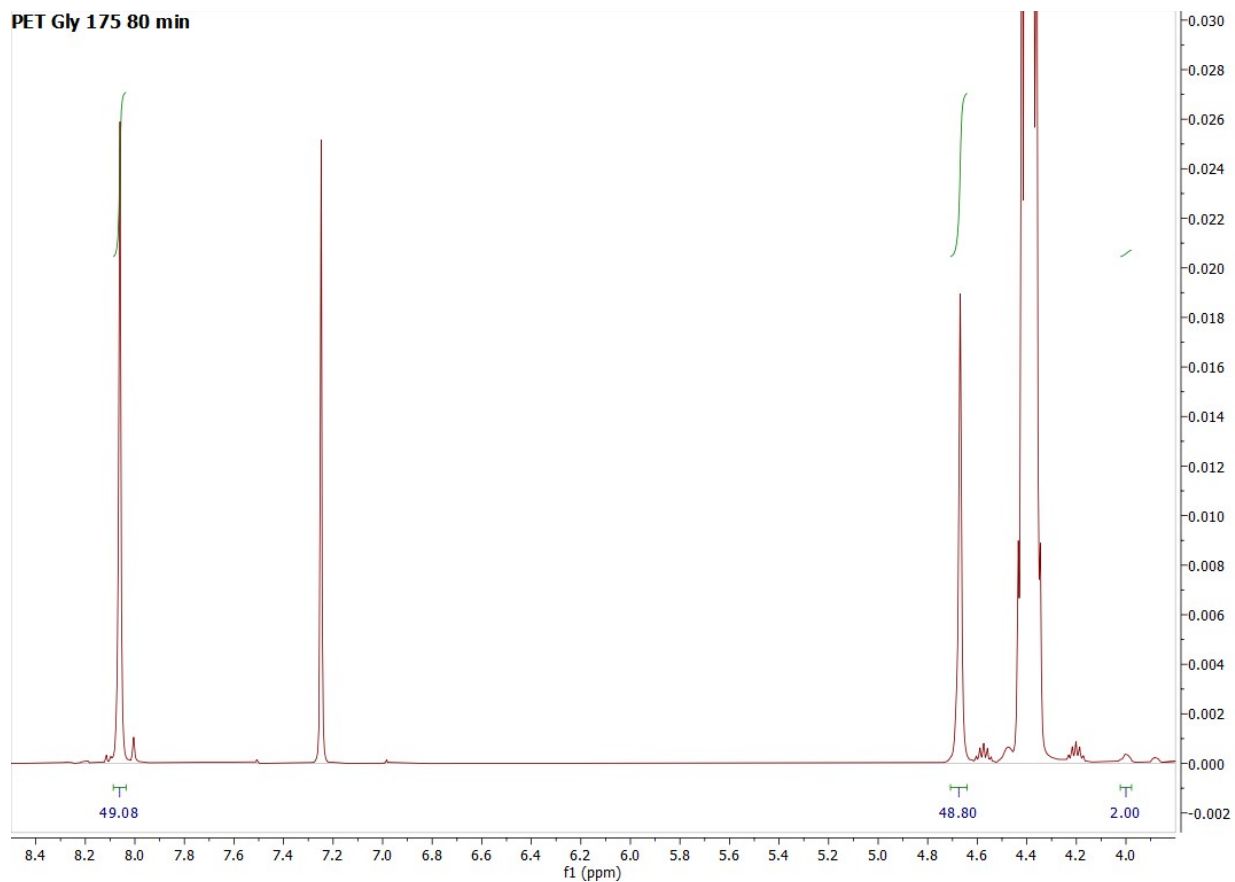

Figure S17-NMR spectra for the depolymerized PET from an 80-minute glycolysis reaction run at 175 °C, PET:Zn(Ac)<sub>2</sub> mole ratio of 100:1.

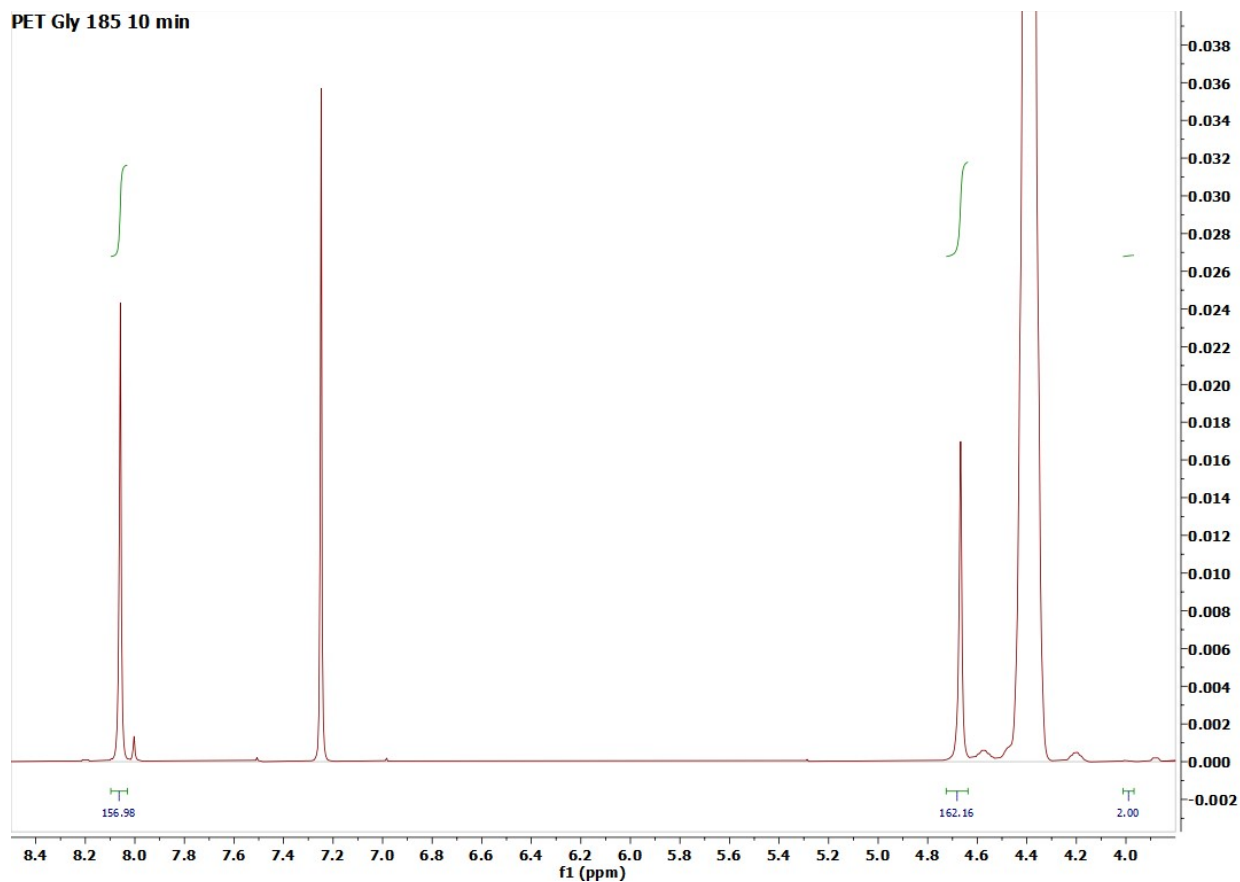

Figure S18-NMR spectra for the depolymerized PET from a 10-minute glycolysis reaction run at 185 °C, PET:Zn(Ac)<sub>2</sub> mole ratio of 100:1.

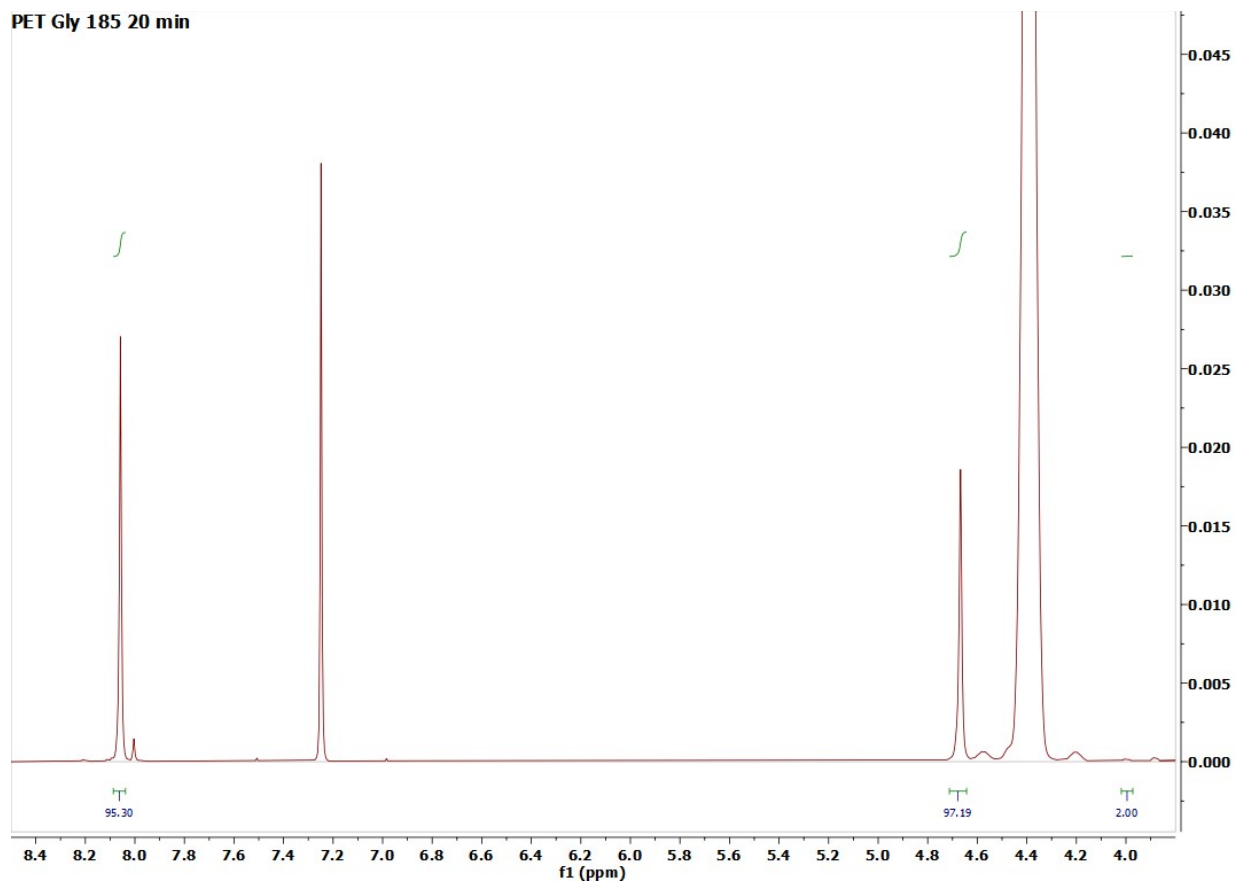

Figure S19-NMR spectra for the depolymerized PET from a 20-minute glycolysis reaction run at 185 °C, PET:Zn(Ac)<sub>2</sub> mole ratio of 100:1.

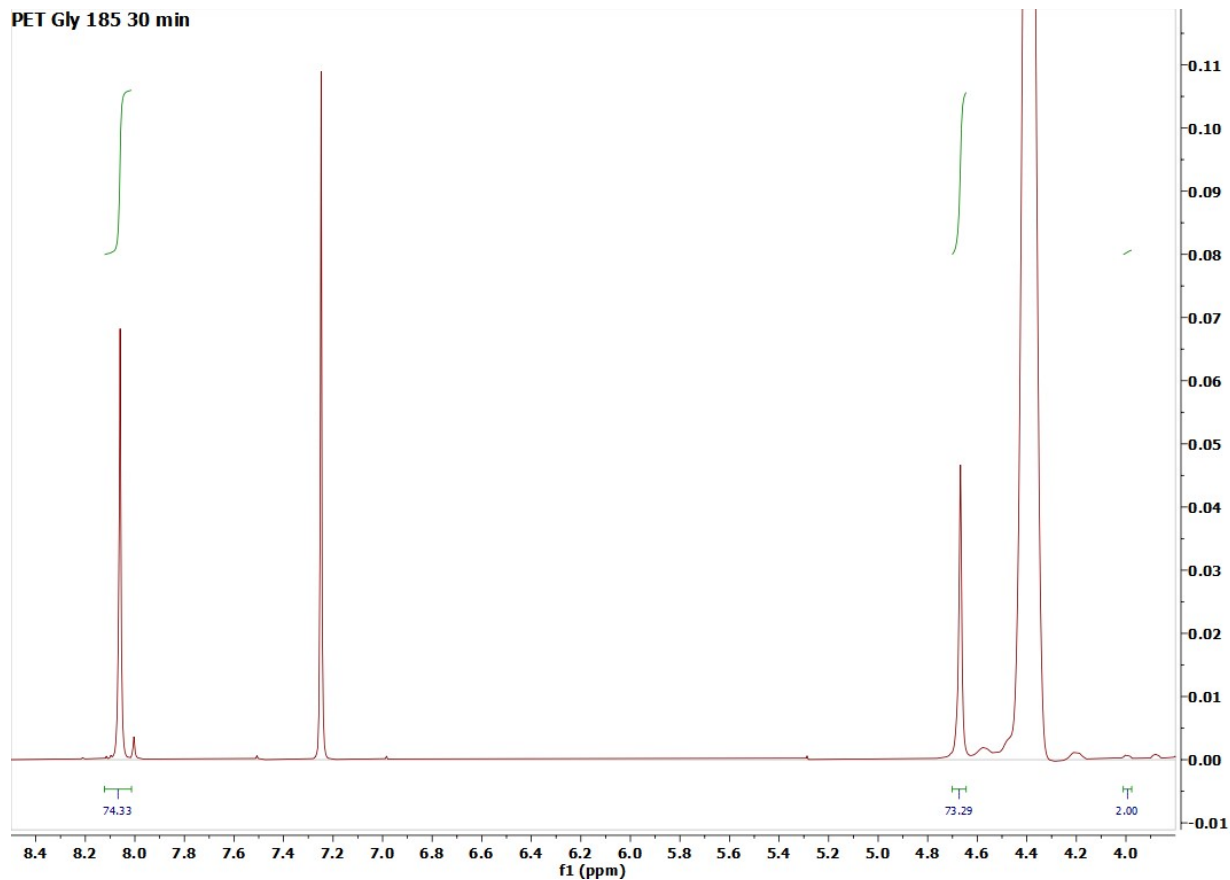

Figure S20-NMR spectra for the depolymerized PET from a 30-minute glycolysis reaction run at 185 °C, PET:Zn(Ac)<sub>2</sub> mole ratio of 100:1.

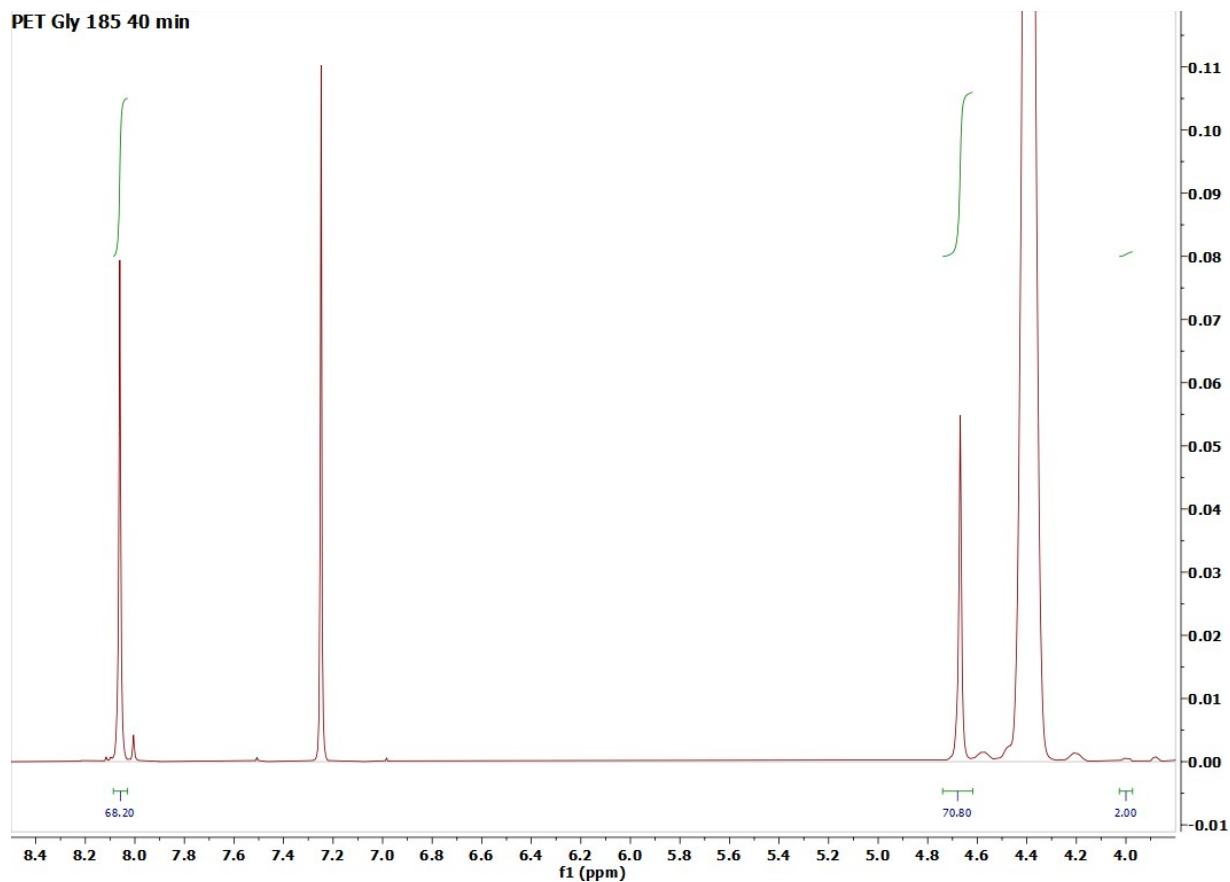

Figure S21-NMR spectra for the depolymerized PET from a 40-minute glycolysis reaction run at 185 °C, PET:Zn(Ac)<sub>2</sub> mole ratio of 100:1.

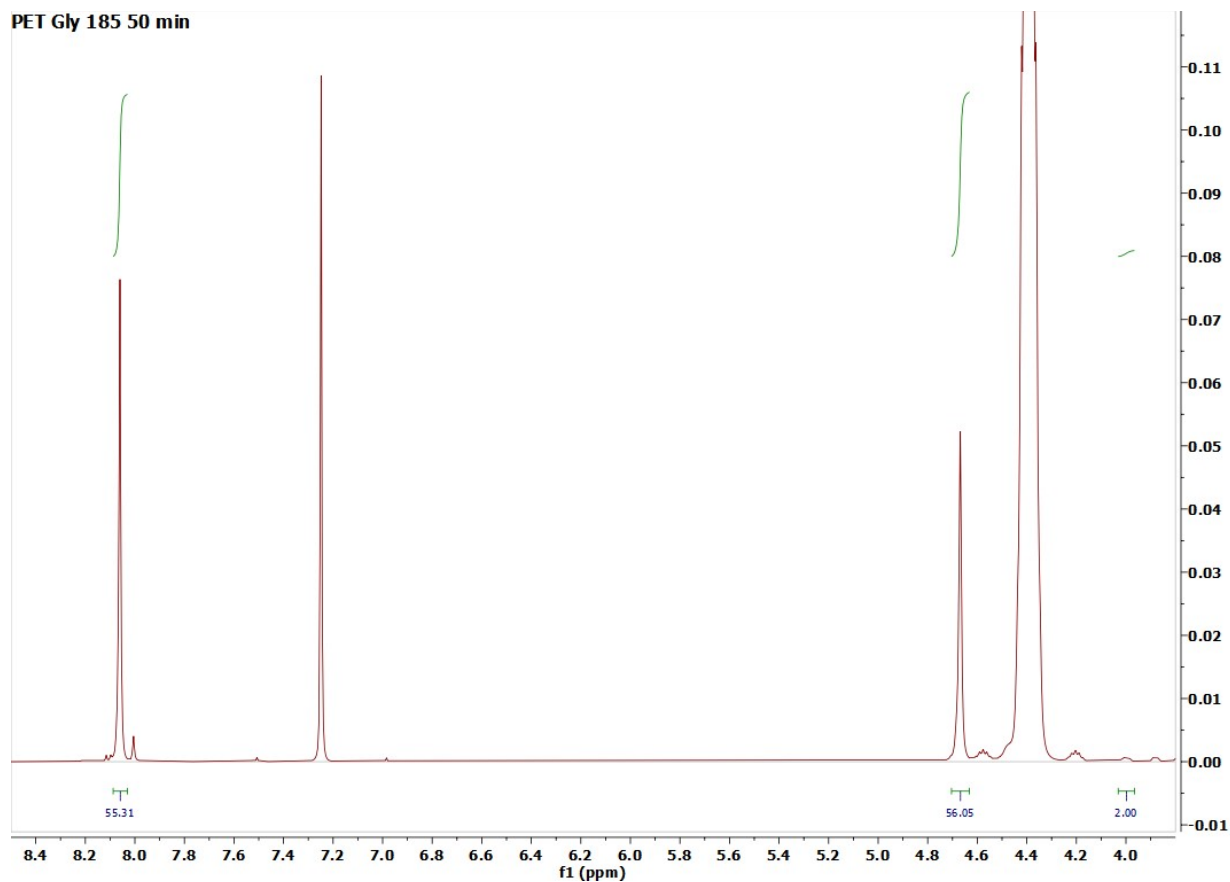

Figure S22-NMR spectra for the depolymerized PET from a 50-minute glycolysis reaction run at 185 °C, PET:Zn(Ac)<sub>2</sub> mole ratio of 100:1.

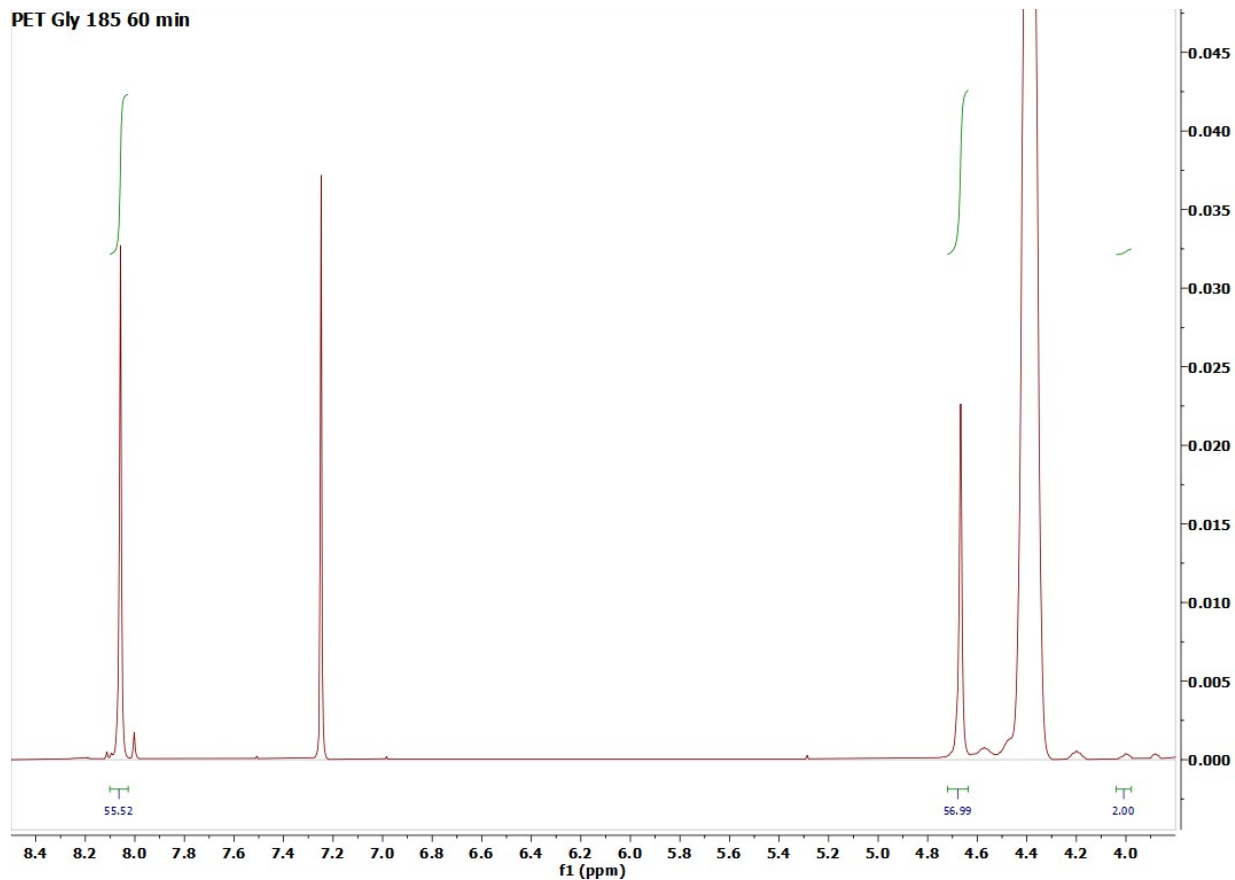

Figure S23-NMR spectra for the depolymerized PET from a 60-minute glycolysis reaction run at 185 °C, PET:Zn(Ac)<sub>2</sub> mole ratio of 100:1.

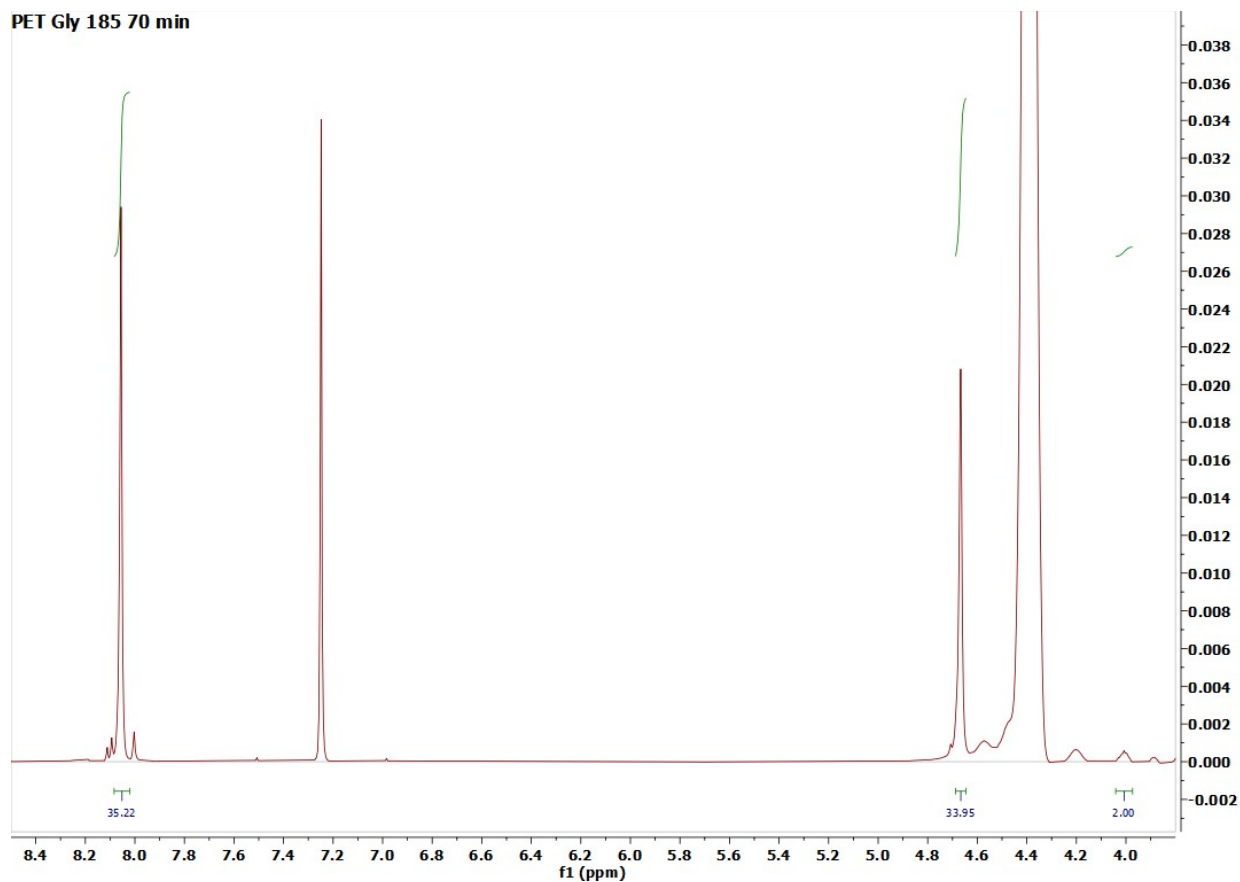

Figure S24-NMR spectra for the depolymerized PET from a 70-minute glycolysis reaction run at 185 °C, PET:Zn(Ac)<sub>2</sub> mole ratio of 100:1.



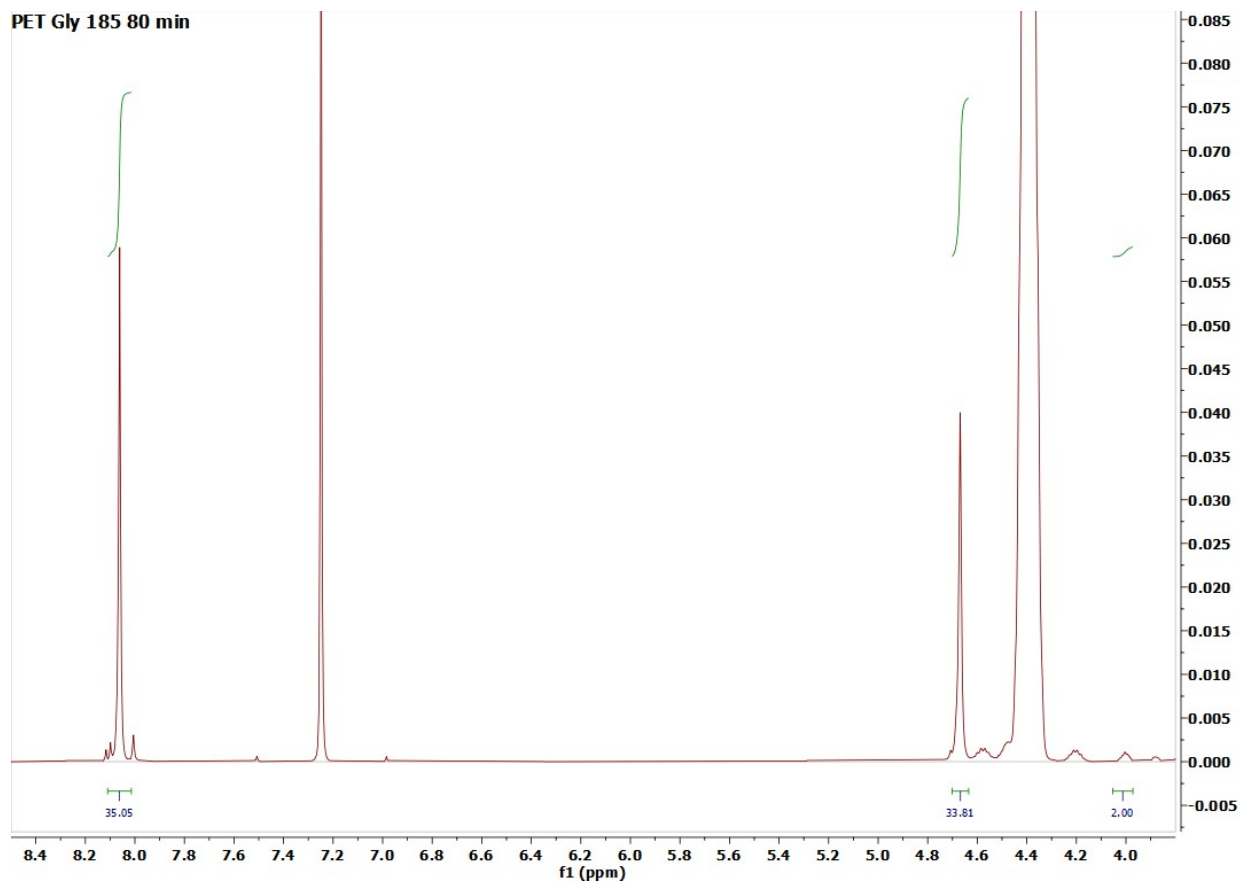

Figure S25-NMR spectra for the depolymerized PET from an 80-minute glycolysis reaction run at 185 °C, PET:Zn(Ac)<sub>2</sub> mole ratio of 100:1.

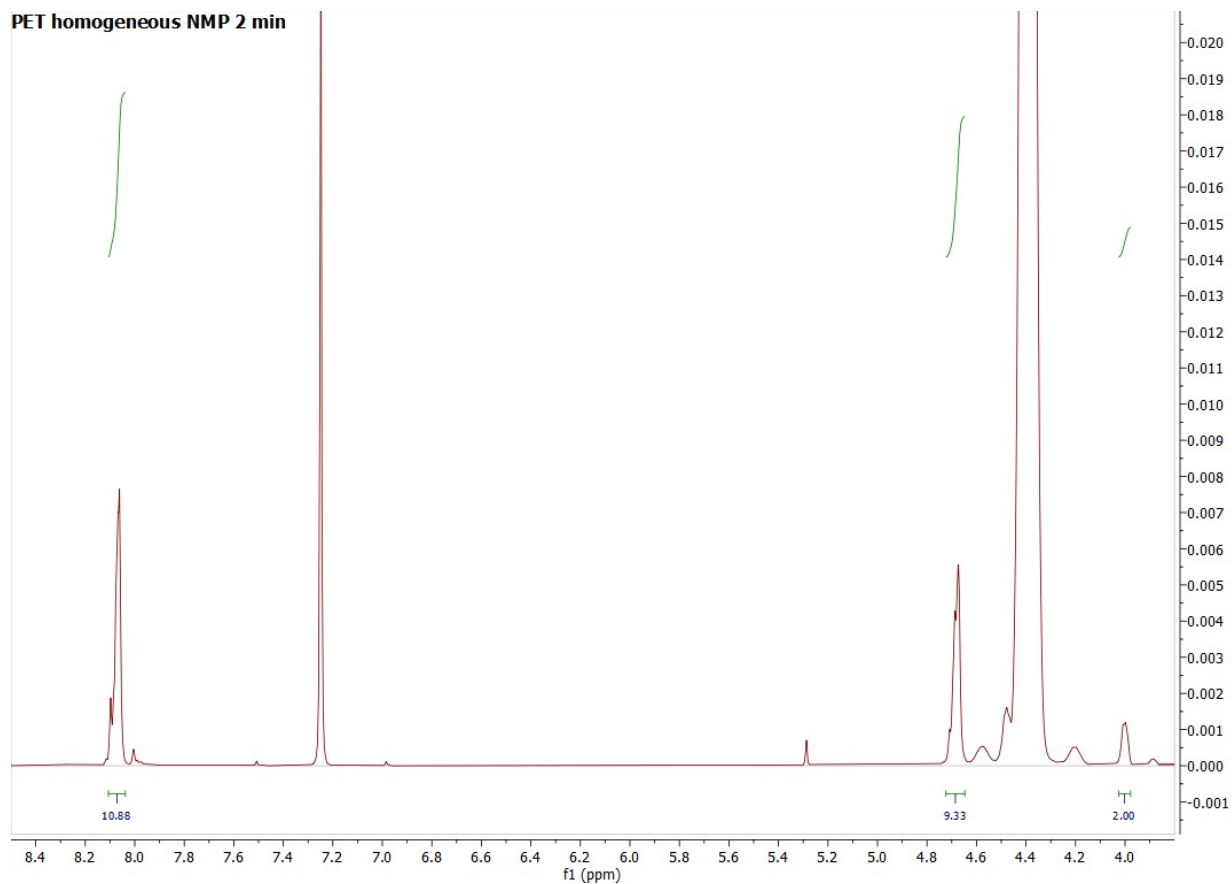

Figure S26- NMR spectra for the depolymerized PET from a 2-minute homogenous glycolysis reaction in N-methyl-2-pyrrolidone.

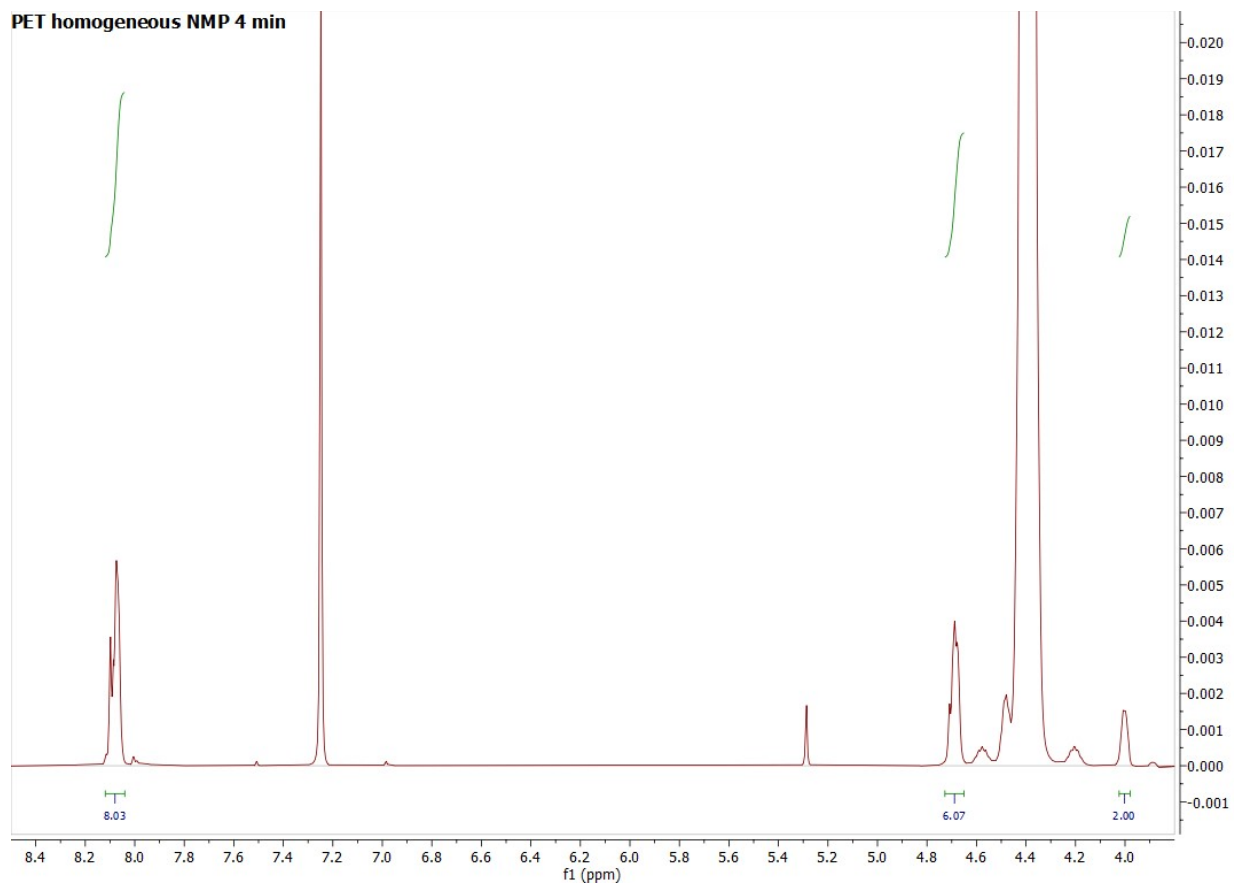

Figure S27-NMR spectra for the depolymerized PET from a 4-minute homogenous glycolysis reaction in N-methyl-2-pyrrolidone.

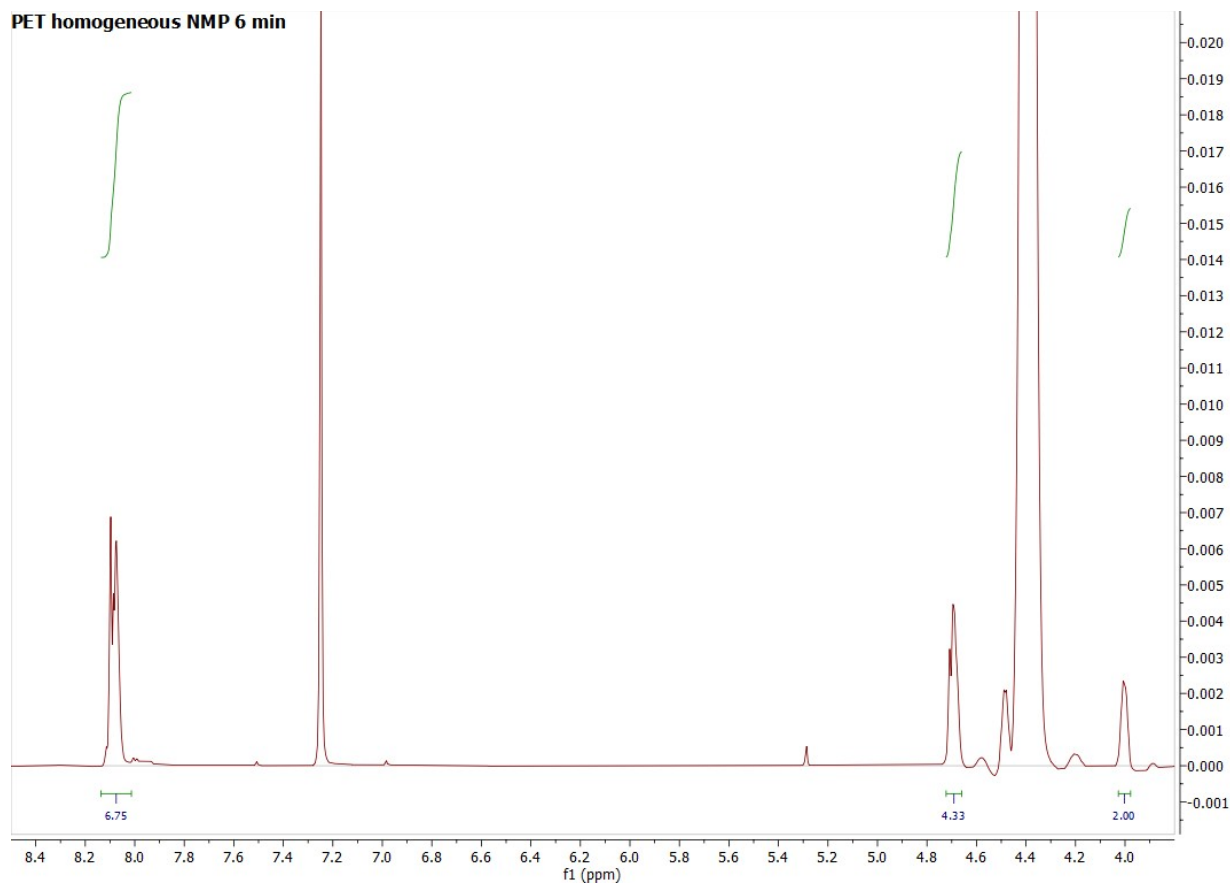

Figure S28-NMR spectra for the depolymerized PET from a 6-minute homogenous glycolysis reaction in N-methyl-2-pyrrolidone.

### 2.3.3 Calibration Standard Chromatograms

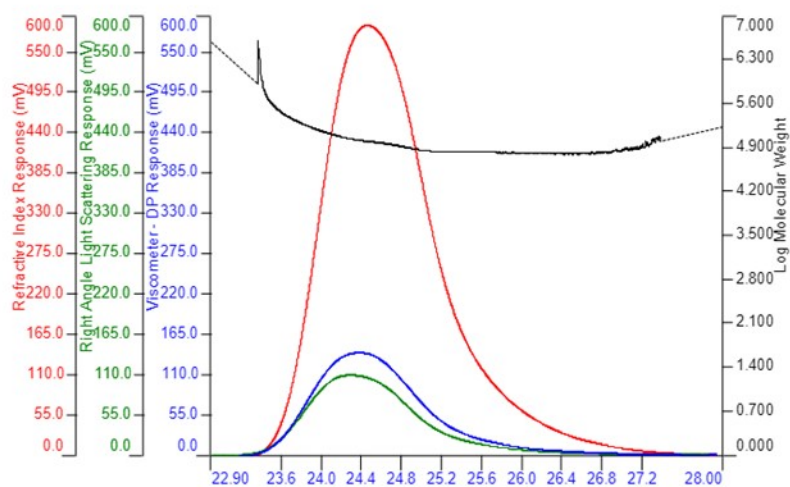

Table 3.1 GPC results of samples analyzed

| ID                         | Injec. | dn/dc <sup>a</sup><br>(mL/g) | V <sub>D</sub><br>(mL) | M <sub>n</sub><br>(Da) | M <sub>w</sub><br>(Da) | M <sub>z</sub><br>(Da) | M <sub>p</sub><br>(Da) | M <sub>w</sub> /M <sub>n</sub><br>(PDI) | [η]<br>(dl/g) | R <sub>n</sub><br>(nm) | M-H<br>α | M-H<br>Log K | Rec.<br>(%) |
|----------------------------|--------|------------------------------|------------------------|------------------------|------------------------|------------------------|------------------------|-----------------------------------------|---------------|------------------------|----------|--------------|-------------|
| Polyethylene terephthalate | 1      | 0.240                        | 24.92                  | 29,039                 | 55,201                 | 92,720                 | 51,582                 | 1.90                                    | 0.84          | 8.57                   | 0.75     | -3.59        | 98.9        |

<sup>a</sup> dn/dc value of 0.240 mL/g for PET in HFIP.

Figure S29- Data for PET starting materials from soft drink bottle analyzed via size exclusion chromatography analysis by PolyAnalytik.
